# Supplementary material for: Ultrafast synthesis of nanosized Ti-Beta as an efficient oxidation catalyst via a structural reconstruction method
Source: Royal Society of Chemistry journal article supplement (doi:10.1039/c9cy00071b), 2019-01-01
Supplement: c9cy00071b1.pdf [file c9cy00071b1.pdf]

**Ultrafast Synthesis of Nanosized Ti-Beta *via* Structural Reconstruction Method  
as Efficient Oxidation Catalyst**

Bowen Wang, Hao Xu\*, Zhiguo Zhu, Yejun Guan and Peng Wu\*

Corresponding Address:

*Shanghai Key Laboratory of Green Chemistry and Chemical Processes, School of  
Chemistry and Molecular Engineering, East China Normal University, North  
Zhongshan Road 3663, Shanghai 200062, People's Republic of China*

*Tel: +86-21-6223-2292*

*Fax: +86-21-6223-2292*

*E-mail address: [hxu@chem.ecnu.edu.cn](mailto:hxu@chem.ecnu.edu.cn) (H. Xu); [pwu@chem.ecnu.edu.cn](mailto:pwu@chem.ecnu.edu.cn) (P. Wu)*

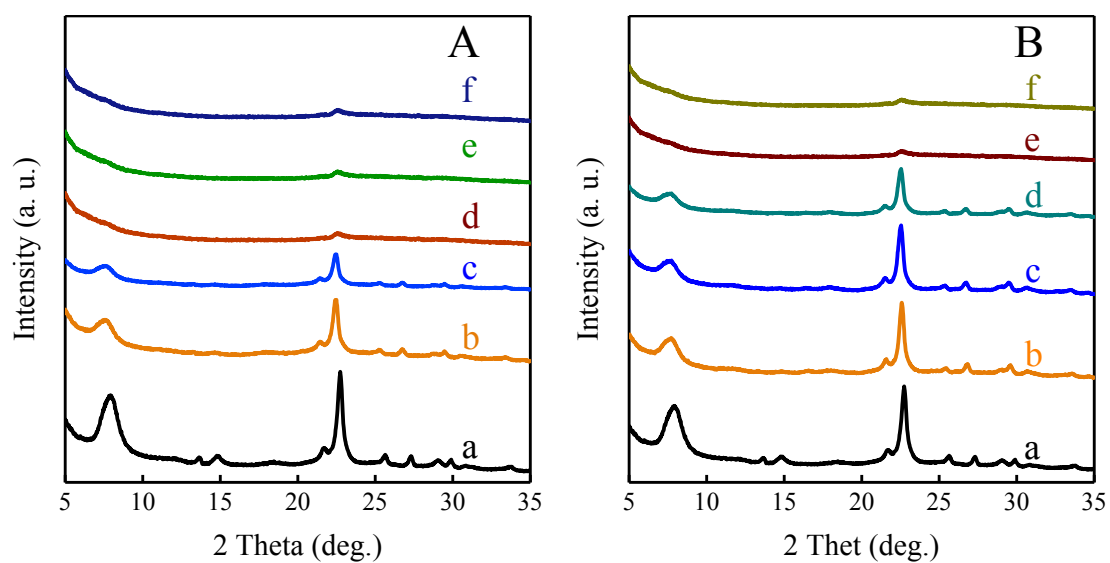

**Fig. S1** (A) XRD patterns of Beta-DA (a), dissolved Beta-DA prepared at TEAOH/Si 0.1 (b), 0.2 (c), 0.3 (d), 0.4 (e) and 0.5 (f). Other dissolution conditions: Si/Ti = 50; H<sub>2</sub>O/Si = 7.5; temp., 413 K; time, 1 h; (B) XRD patterns of Beta-DA (a), dissolved Beta-DA prepared with the H<sub>2</sub>O/Si molar ratio of 1 (b), 2 (c), 3 (d), 4 (e) and 7.5 (f). Other dissolution conditions: Si/Ti = 50; TEAOH/Si = 0.3; temp., 413 K; time, 1 h.

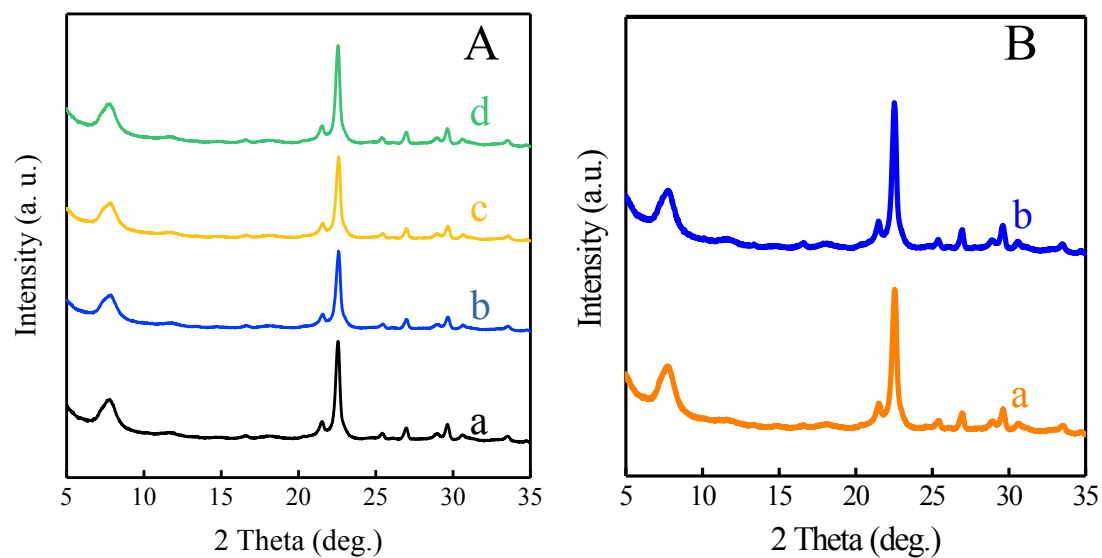

**Fig. S2** (A) The XRD patterns of the products crystallized at TEAOH/SiO<sub>2</sub> ratio of 0.2 (a), 0.3 (b), 0.4 (c), 0.5 (d). Other crystallization conditions: Si/Ti = 50; NH<sub>4</sub>F/Si = 0.5; H<sub>2</sub>O/Si = 7.5; temp., 413 K; time, 24 h; (B) XRD patterns of the products crystallized at H<sub>2</sub>O/Si ratio of 7.5 (a), 4 (b). Other crystallization conditions: Si/Ti = 50; NH<sub>4</sub>F/Si = 0.5; TEAOH/Si = 0.3; temp., 413 K; time, 24 h.

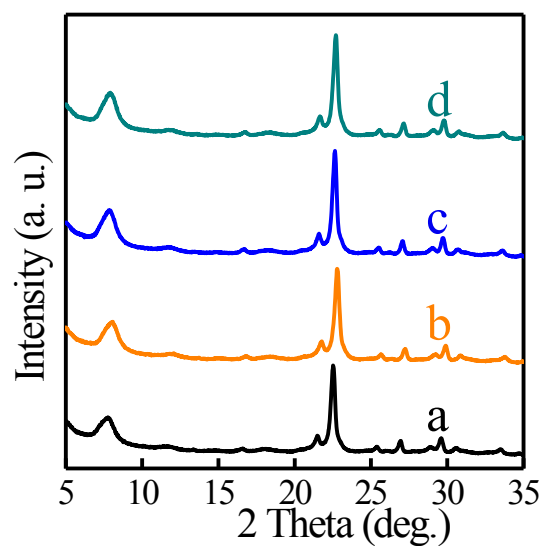

**Fig. S3** XRD patterns of Ti-Beta-Re samples crystallized at 413 K (a), 433 K (b), 443 K (c) and 463 K (d). Other crystallization conditions: Si/Ti = 50; H<sub>2</sub>O/Si = 7.5; TEAOH/Si = 0.3; time, 24 h.

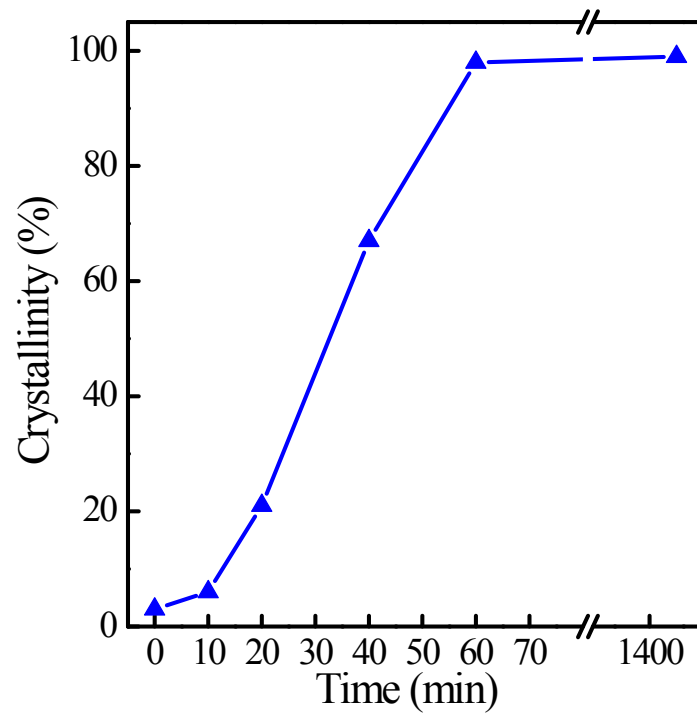

**Fig. S4** Time-dependent crystallinity curve of Ti-Beta-Re-50 sample in the recrystallization process.

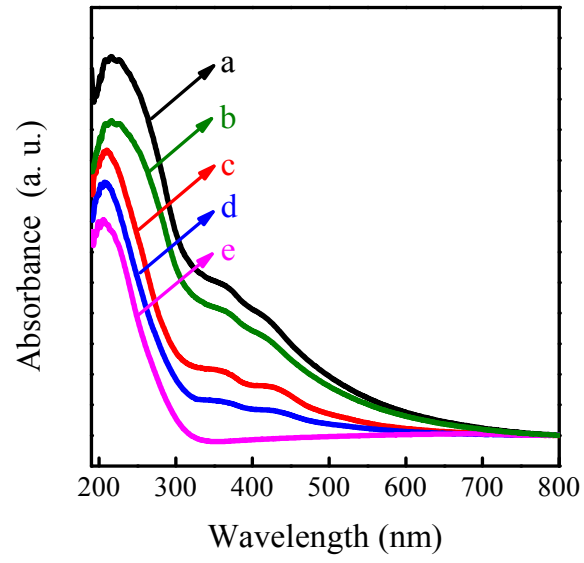

**Fig. S5** UV-vis spectra of Ti-Beta-Re-50 obtained in recrystallization process for 0 min (a), 10 min (b), 20 min (c), 40 min (d), 60 min (e).

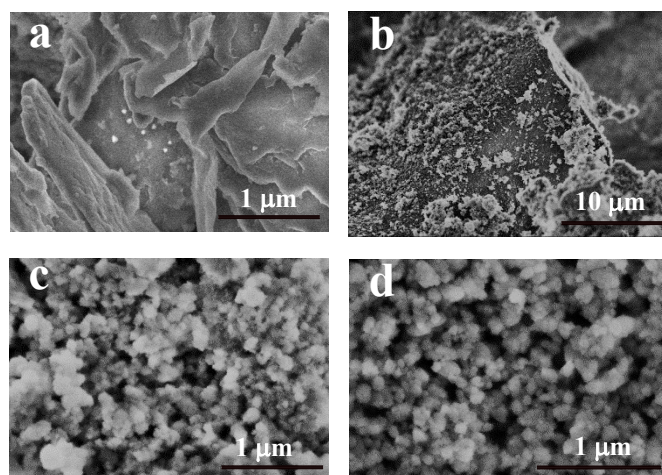

**Fig. S6** SEM images of Ti-Beta-Re crystallized for 0 min (a), 20 min (b), 40 min (c) and 60 min (d).

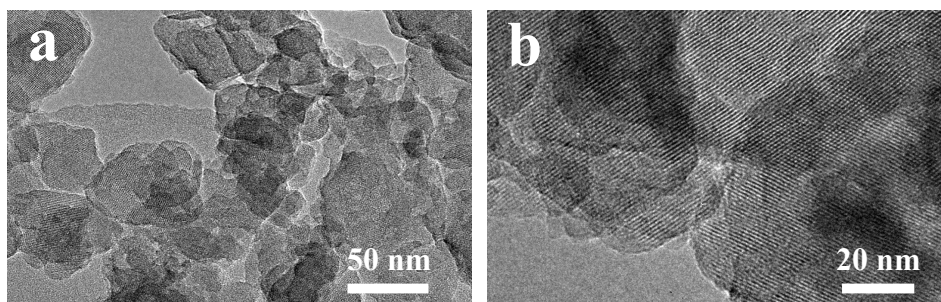

**Fig. S7** TEM images of Ti-Beta-Re-50 sample.



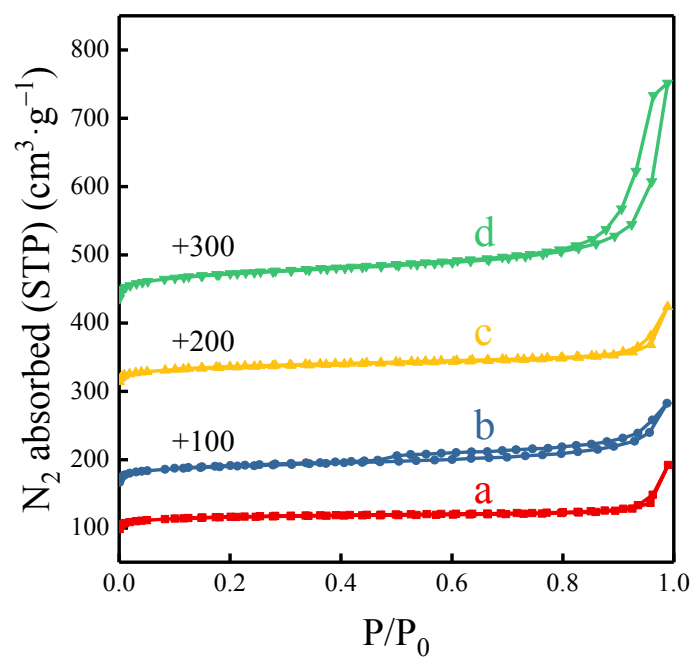

**Fig. S8**  $\text{N}_2$  adsorption-desorption isotherms of Ti-Beta-OH-50 (a), Ti-Beta-PS (b), Ti-Beta-F-50 (c), Ti-Beta-Re-50 (d).

**Table S1** Decomposition and attribution of  $^{29}\text{Si}$  MAS NMR spectra

| Attribution    | $\delta$ (ppm) | Area (%)      |              |               |            |
|----------------|----------------|---------------|--------------|---------------|------------|
|                |                | Ti-Beta-Re-50 | Ti-Beta-F-50 | Ti-Beta-OH-50 | Ti-Beta-PS |
| Q <sup>3</sup> | -103           | 2.87          | 4.48         | 8.71          | 12.3       |
|                | -108           | 7.23          | 15.78        | 16.01         | 5.33       |
| Q <sup>4</sup> | -113           | 62.62         | 59.53        | 58.23         | 60.11      |
|                | -116           | 27.32         | 20.2         | 17.05         | 22.26      |

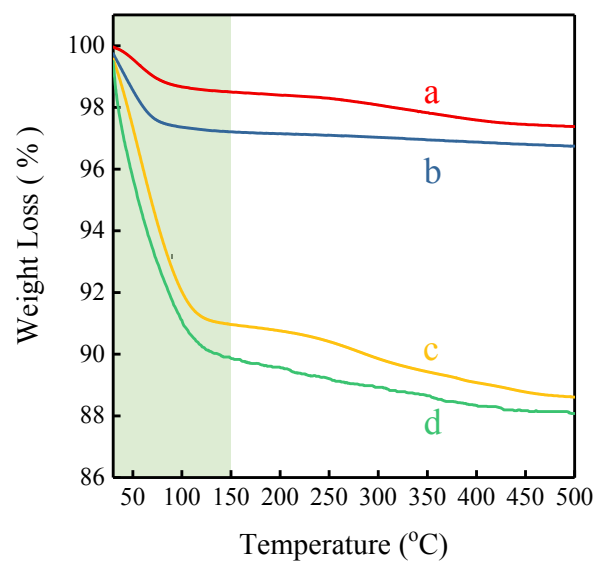

**Fig. S9** Thermogravimetric curves for Ti-Beta-Re-50 (a), Ti-Beta-F-50 (b), Ti-Beta-OH-50 (c), and Ti-Beta-PS (d) after saturated with water vapor over aqueous  $\text{NH}_4\text{Cl}$  solution overnight in a desiccator.

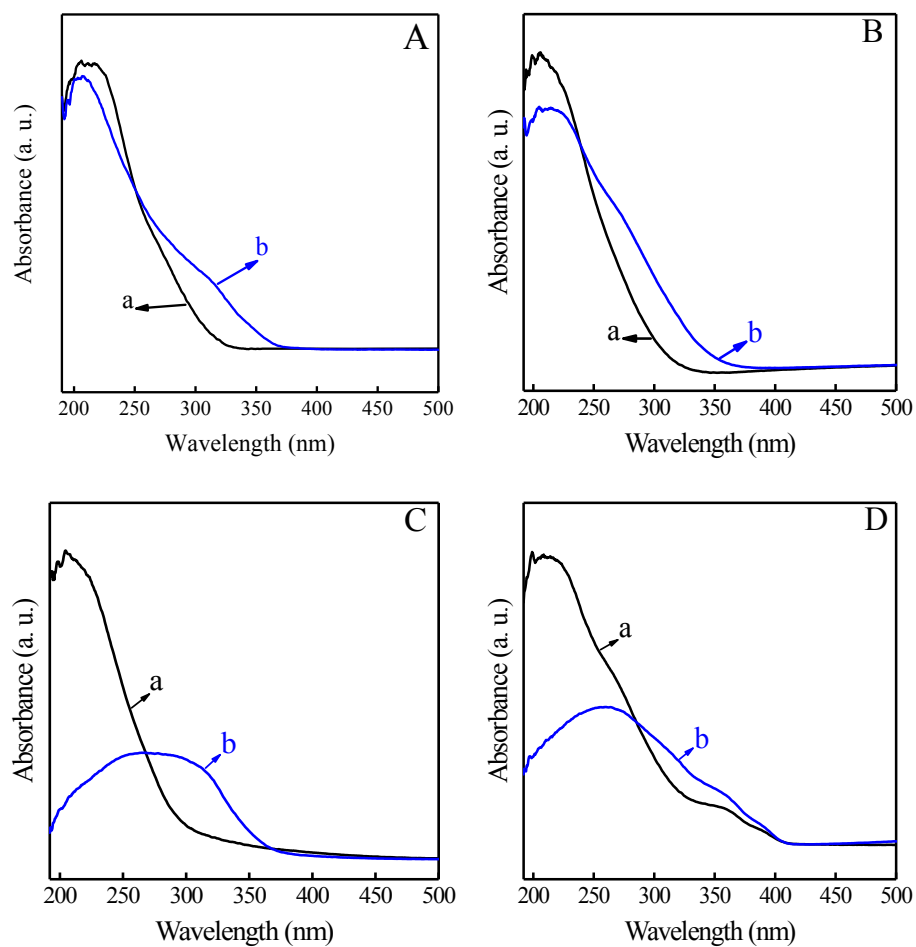

**Fig. S10** UV-vis spectra of fresh parent (a), the used catalyst after calcination (b) of Ti-Beta-Re-50 (A), Ti-Beta-F-50 (B), Ti-Beta-OH-50 (C), Ti-Beta-PS (D).
